# Supplementary material for: Quantifying irreversible movement in steep, fractured bedrock permafrost on Matterhorn (CH)
Source: Copernicus journal article supplement (doi:10.5194/tc-11-567-2017), 2017-02-16
Supplement: Supplementary file 1 [file tc-11-567-2017-supplement.zip]

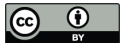

## *Supplement of*

# **Quantifying irreversible movement in steep, fractured bedrock permafrost on Matterhorn (CH)**

**Samuel Weber et al.**

*Correspondence to:* Samuel Weber ([samuel.weber@geo.uzh.ch](mailto:samuel.weber@geo.uzh.ch))

- [tc-11-567-2017-supplement-title-page.pdf](#)
- [exported\\_data](#)
  - [mh01.csv](#)
  - [mh02.csv](#)
  - [mh03.csv](#)
  - [mh04.csv](#)
  - [mh06.csv](#)
  - [mh08.csv](#)
  - [mh10.csv](#)
  - [mh11.csv](#)
  - [mh12.csv](#)
  - [mh20.csv](#)
  - [mh21.csv](#)
  - [mh22.csv](#)

The copyright of individual parts of the supplement might differ from the CC-BY 3.0 licence.
